# Supplementary material for: Head-to-Head Comparison between Peptide-Based Radiopharmaceutical for PET and SPECT in the Evaluation of Neuroendocrine Tumors: A Systematic Review
Source: MDPI journal article supplement (doi:10.3390/cimb44110373), 2022-11-07
Supplement: s1 [file s1]

|                                                                                        |    |  |     |     |     |     |     |     |     |     |     |     |     |     |     |     |     |     |     |     |     |
|----------------------------------------------------------------------------------------|----|--|-----|-----|-----|-----|-----|-----|-----|-----|-----|-----|-----|-----|-----|-----|-----|-----|-----|-----|-----|
| 8. How sure are we about the results? Consequences and cost of alternatives performed? | GP |  | MED | MED | MED | HIG | HIG | HIG | HIG | HIG | HIG | LOW | LOW | LOW | MED | LOW | MED | HIG | LOW | LOW | HIG |
|                                                                                        | LE |  | MED | MED | MED | HIG | HIG | HIG | HIG | HIG | HIG | LOW | LOW | LOW | MED | LOW | MED | HIG | LOW | LOW | HIG |
|                                                                                        | AG |  |     |     |     |     |     |     |     |     |     |     |     |     |     |     |     |     |     |     |     |
| 9. Can the results be applied to your patients/ the population of interest?            | GP |  | CT  | Y   | Y   | CT  | CT  | CT  | CT  | CT  |
|                                                                                        | LE |  | Y   | Y   | Y   | Y   | Y   | Y   | Y   | Y   | Y   | CT  | CT  | CT  | Y   | CT  | CT  | Y   | Y   | CT  | CT  |
|                                                                                        | AG |  | Y   | Y   | Y   | Y   | Y   | Y   | Y   | Y   | Y   |     |     |     |     | CT  |     | Y   | Y   |     |     |
| 10. Can the test be applied to your patient or population of interest?                 | GP |  | N   | CT  | Y   | Y   | CT  | CT  | CT  | CT  | CT  |
|                                                                                        | LE |  | Y   | Y   | Y   | Y   | Y   | Y   | Y   | Y   | Y   | CT  | CT  | CT  | Y   | CT  | CT  | Y   | Y   | CT  | CT  |
|                                                                                        | AG |  | Y   | Y   | Y   | Y   | Y   | Y   | Y   | Y   | Y   |     |     |     |     | CT  |     | Y   | Y   |     |     |
| 11. Were all outcomes important to the individual or population considered?            | GP |  | CT  | Y   | Y   | CT  | Y   | Y   | CT  | Y   | CT  | CT  | Y   | Y   | Y   | Y   | Y   | Y   | CT  | Y   | N   |
|                                                                                        | LE |  | CT  | CT  | Y   | CT  | Y   | Y   | CT  | Y   | CT  | CT  | CT  | CT  | Y   | CT  | Y   | Y   | CT  | CT  | N   |
|                                                                                        | AG |  |     | CT  |     |     |     |     |     |     |     |     | CT  | CT  |     | CT  |     |     |     | CT  |     |
| 12. What would be the impact of using this test on your patients/population?           | GP |  | DK  | DK  | DK  | DK  | DK  | HIG | DK  | HIG | HIG | DK  | DK  | DK  | DK  | CLD | CLD | CLD | DK  | CLD | DK  |
|                                                                                        | LE |  | CLD | DK  | DK  | DK  | CLD | HIG | DK  | HIG | HIG | DK  | DK  | DK  | DK  | CLD | CLD | CLD | DK  | CLD | DK  |
|                                                                                        | AG |  | CLD |     |     |     | CLD |     |     |     |     |     |     |     |     |     |     |     |     |     |     |

GP: Giulia Poletto; LE: Laura Evangelista; AG: agree; Y: yes; N: No, CT: can't tell; CLR: clear; NCLR: not clear; MED: medium; HIG: high; DK: don't know; CLD: it could

**Table S2.** Change of management with PET imaging in patients affected by neuroendocrine tumor

| <b>Authors, ref</b>    | <b>Number of patients with change/total study population</b> | <b>% of change management</b> |
|------------------------|--------------------------------------------------------------|-------------------------------|
| Buchmann et al         | 1/27                                                         | 3.7%                          |
| Srirajaskanthan et al, | 36/51                                                        | 70.6%                         |
| Gabriel et al (2007),  | 12/84                                                        | 14.3%                         |
| Madrzak et al,         | 2/24                                                         | 8.4%                          |
| Krausz et al,          | 3/19                                                         | 15.8%                         |
